# Supplementary material for: Chemical and dynamical identification of emission outflows during the HALO campaign EMeRGe in Europe and Asia
Source: Copernicus journal article supplement (doi:10.5194/acp-2022-455), 2022-07-19
Supplement: Supplementary file 1 [file acp-2022-455-supplement.pdf]

# Supplement

## To Section 2: EMeRGe research flights

Table S1 gives an overview of the flight labelling, take-off, and departure times as well as flight duration and the base (departure airport) of HALO during EMeRGe-Europe (EM-EU) and EMeRGe-Asia (EM-AS). EM-EU-01 and -02 are test flights and not listed. The transfer flights from Europe to Asia and back are not included in the Asian analysis. During the transfer flights EM-AS-02 and EM-AS-15, HALO had no permission to conduct any measurements.

Table S1: Overview of EMeRGe flights. UAE - United Arab Emirates.

| Flight label | Flight date<br>(dd.mm.yyyy) | Take off<br>(UTC) | Departure<br>(UTC) | Duration<br>(hh:mm) | Base/transfer                               | Probing targets (outflows)                      |
|--------------|-----------------------------|-------------------|--------------------|---------------------|---------------------------------------------|-------------------------------------------------|
| EM-EU-03     | 11.07.2017                  | 10:00             | 16:30              | 06:30               | Oberpfaffenhofen/Germany                    | Po Valley, Rome                                 |
| EM-EU-04     | 13.07.2017                  | 10:40             | 15:00              | 04:20               | Oberpfaffenhofen/Germany                    | S Germany (Allgäu), Munich                      |
| EM-EU-05     | 17.07.2017                  | 10:30             | 18:30              | 08:00               | Oberpfaffenhofen/Germany                    | London, Paris                                   |
| EM-EU-06     | 20.07.2017                  | 09:00             | 17:30              | 08:30               | Oberpfaffenhofen/Germany                    | Po Valley, Rome, Munich                         |
| EM-EU-07     | 24.07.2017                  | 09:45             | 18:15              | 08:30               | Oberpfaffenhofen/Germany                    | Marseille, Barcelona, W Europe, W Mediterranean |
| EM-EU-08     | 26.07.2017                  | 07:45             | 15:20              | 07:35               | Oberpfaffenhofen/Germany                    | London, Ruhr area, Paris                        |
| EM-EU-09     | 28.07.2017                  | 10:00             | 18:30              | 08:30               | Oberpfaffenhofen/Germany                    | Barcelona, Madrid, Marseille, SE France, Munich |
| EM-EU        |                             |                   |                    | 51:55:00            |                                             |                                                 |
| EM-AS-01     | 10.03.2018                  | 07:40             | 15:30              | 07:50               | Oberpfaffenhofen/Germany<br>→ Abu Dhabi/UAE | Rome (Italy), Athens (Greece)                   |
| EM-AS-02     | 11.03.2018                  |                   |                    |                     | Abu Dhabi/UAE<br>→ U-Tapao/Thailand         | no measurement permission                       |
| EM-AS-03     | 12.03.2018                  | 04:50             | 11:20              | 06:30               | U-Tapao/Thailand<br>→ Tainan/Taiwan         | Bangkok (Thailand), China                       |
| EM-AS-04     | 17.03.2018                  | 01:10             | 09:45              | 08:35               | Tainan/Taiwan                               | China                                           |
| EM-AS-05     | 19.03.2018                  | 00:20             | 08:25              | 08:05               | Tainan/Taiwan                               | Shanghai, Taipei                                |
| EM-AS-06     | 20.03.2018                  | 19.03.2018 23:50  | 20.03.2018 06:35   | 06:45               | Tainan/Taiwan                               | Manila                                          |
| EM-AS-07     | 22.03.2018                  | 03:50             | 09:30              | 05:40               | Tainan/Taiwan                               | China, Taiwan                                   |
| EM-AS-08     | 24.03.2018                  | 01:00             | 09:50              | 08:50               | Tainan/Taiwan                               | China, Taiwan                                   |
| EM-AS-09     | 26.03.2018                  | 00:25             | 09:25              | 09:00               | Tainan/Taiwan                               | China, Taipei                                   |
| EM-AS-10     | 28.03.2018                  | 27.03.2018 23:50  | 28.03.2018 08:30   | 08:40               | Tainan/Taiwan                               | Manila, Pearl River Delta, Taiwan               |
| EM-AS-11     | 30.03.2018                  | 00:05             | 09:25              | 09:20               | Tainan/Taiwan                               | Yangtze River Delta, S Japan                    |
| EM-AS-12     | 03.04.2018                  | 00:25             | 06:25              | 06:00               | Tainan/Taiwan                               | Taiwan                                          |
| EM-AS-13     | 04.04.2018                  | 00:30             | 09:25              | 08:55               | Tainan/Taiwan                               | S Japan, Taiwan                                 |
| EM-AS-14     | 07.04.2018                  | 01:00             | 08:40              | 07:40               | Tainan/Taiwan<br>→ U-Tapao/Thailand         | China, SE Asia, Bangkok                         |
| EM-AS-15     | 08.04.2018                  |                   |                    |                     | U-Tapao/Thailand<br>→ Abu Dhabi/UAE         | no measurement permission                       |
| EM-AS-16     | 09.04.2018                  | 06:00             | 14:45              | 08:45               | Abu Dhabi/UAE<br>→ Oberpfaffenhofen/Germany | W Asia, N Africa, Greece, Munich (Germany)      |
| EM-AS        |                             |                   |                    | 110:35:00           |                                             |                                                 |

## To Section 3.1.2: Assessment of measurement noise

We assess VOC-specific measurement noises by smoothing the raw signal with a Savitzky-Golay filter (Savitzky and Golay, 1964) and estimate the noise as the standard deviation of the residuals (Fig. S1). We choose this filter technique because it is preferred for retrieving the original signal structure while removing noise (Acharya et al., 2016). Since the raw signal includes

statistical noises caused by the measurement process itself as well as atmospheric fluctuations, the obtained noise represents both instrumental and atmospheric noises. For the definition of VOC concentration thresholds, we use the average of all VOC-specific noises during EMerGe-Europe and -Asia, respectively.

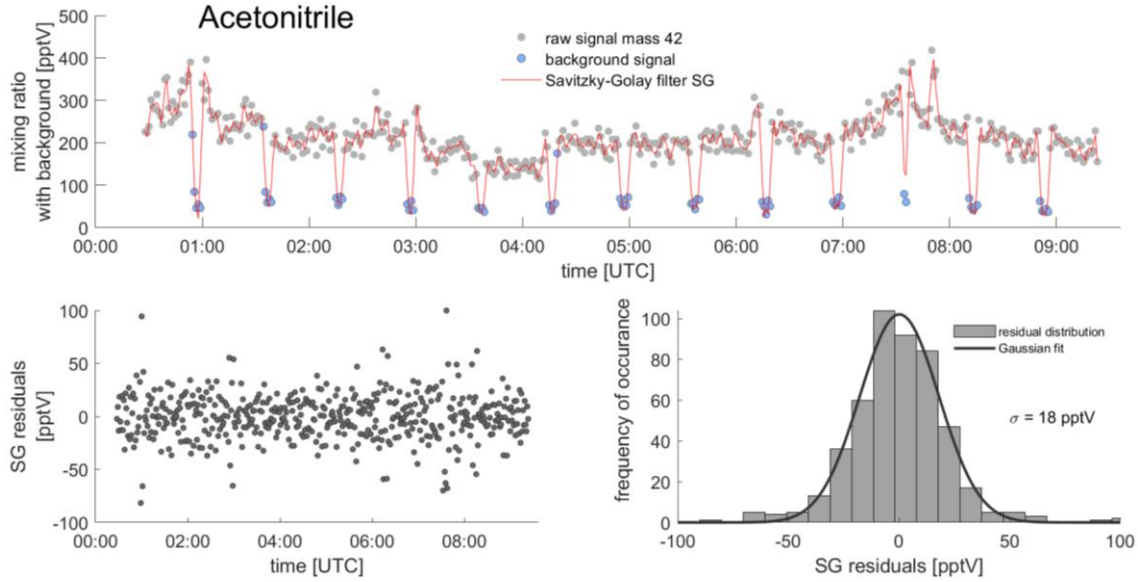

**Figure S1: Noise assessment of acetonitrile using the Savitzky-Golay filter during EM-AS-13, 4<sup>th</sup> April 2018. The noise of 18 pptV is the standard deviation of the residuals distribution.**

### To Section 3.1.2: Atmospheric background determination of acetonitrile

As described in section 3.1.2 of the main document, we use long-term acetonitrile measurements in the tropopause from the IAGOS-CARIBIC data set (Fig. S2a) to assess the free tropospheric background.

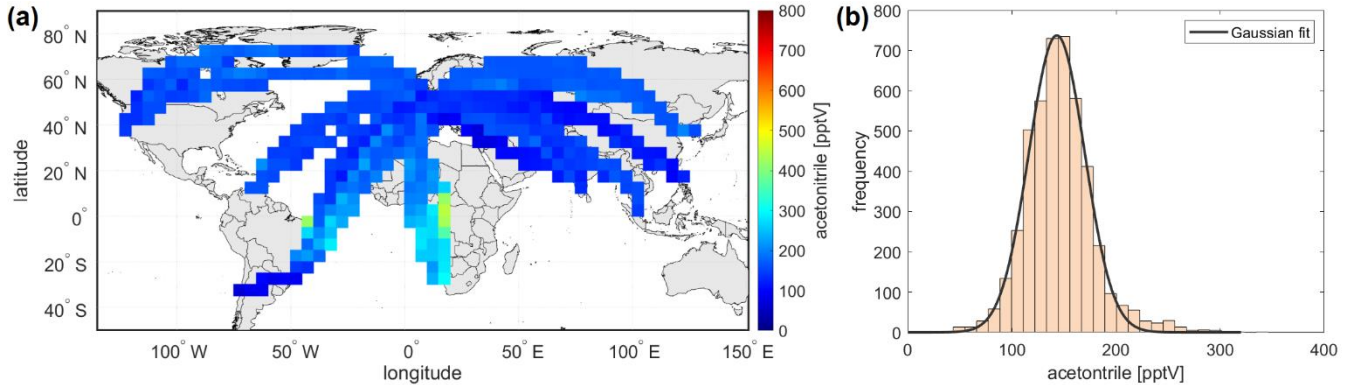

**Figure S2: IAGOS-CARIBIC acetonitrile measurements for the months DJFM. (a) Spatial distribution of all flights (2005-2016) and (b) frequency distribution from 2012 to 2016 for potential vorticities smaller than 2 PVU (tropospheric air) and 35-65° N with a fitted Gaussian normal distribution.**

We selected the northern hemispheric winter seasons (DJFM) of four years prior to the campaign (2012 – 2016). During DJFM, northern hemispheric, tropospheric acetonitrile concentrations are the smallest. They indicate, therefore, the lower background because the active (northern hemispheric) BB season is in summer. By fitting a Gaussian normal distribution onto the frequency distribution of the selected subset (Fig. S2b), we calculated a mean acetonitrile background concentration of 145 pptV for the northern hemispheric troposphere. As the value indicates the lower background, we use it for both EMeRGe in Europe and Asia.

**To Section 3.1.2: Interpolation scheme for emission signatures**

Due to the PTR-MS duty cycle, where the tracers benzene and acetonitrile are measured with a time difference of about 30 seconds by raw signal integration of about six seconds each, we interpolate the identification of emission signatures (based on the tracer enhancement) to cover the general measurement time resolution of one second.

For the interpolation, we use the following assumptions: If VMRs do exceed (not exceed) respective thresholds in two or more consecutive duty cycles, the time in-between is identified as emission signature (no signature) as well. If VMRs do exceed (not exceed) respective thresholds only in a single duty cycle, just the time of raw signal integration is marked as emission signature (no signature). If an exceedance is followed by a non-exceedance and vice versa, we consider the time in-between as not assessable (NA) because the exact time of threshold transition is unknown. During instrumental background detection, no ambient air measurements are available hence no indication of emissions signatures is possible, and we consider these times as NA as well. Same applies for isoprene.

This assumptions lead to higher availabilities of emission signatures when continuous VOC exceedances/non-exceedances are measured and hence to less availability when VOC concentrations vary around the thresholds. Hence, also the use of isoprene as additional tracer (together with acetonitrile and benzene) can lead to less availability compared to the use of only acetonitrile and benzene.

**To Section 4.1: Fractions of emission signatures**

**Table S2: Fractions [%] of (a) enhancements observed in acetonitrile, benzene and isoprene, (b) emission signatures I (*aged BB, BB & BEN* and *AP* inferred from observed enhancements in acetonitrile and benzene; *only BIO* and *BG* inferred with additional isoprene) and (c) emission signatures II (inferred from observed enhancements in acetonitrile, benzene and isoprene). Top: during EMeRGe-Europe, bottom: EMeRGe-Asia. AP – anthropogenic signatures, BB – biomass burning signatures, BEN – benzene enhancements, BIO – fresh biogenic signatures, BG – background, NA – not assessable during instrumental background detection and threshold transitions (due to PTR-MS measurement resolution of one minute per tracer). EU-05 is not available due to instrument failure. The summary of EMeRGe-Asia excludes the non-Asian transfer flights AS-01 and AS-16. This figure is a supplement to Figure 4 of the main document.**

|        | tracer enhancements (a) |   |   |         |   |   |          |   |   | emission signatures I (b) |          |    |          |    |    | emission signatures I (c) |               |               |                |          |                |    |
|--------|-------------------------|---|---|---------|---|---|----------|---|---|---------------------------|----------|----|----------|----|----|---------------------------|---------------|---------------|----------------|----------|----------------|----|
| region | acetonitrile            |   |   | benzene |   |   | isoprene |   |   | aged BB                   | BB & BEN | AP | only BIO | BG | NA | only BB                   | only BB & BIO | only BB & BEN | BB & BEN & BIO | only BEN | only BEN & BIO | NA |
|        | 1                       | 0 | - | 1       | 0 | - | 1        | 0 | - |                           |          |    |          |    |    |                           |               |               |                |          |                |    |

|                           |      |      |      |      |      |      |      |      |      |     |      |      |     |      |      |     |      |      |      |
|---------------------------|------|------|------|------|------|------|------|------|------|-----|------|------|-----|------|------|-----|------|------|------|
| Italy, EU-03              | 0.6  | 76.8 | 22.6 | 15.6 | 58.3 | 26.2 | 7.7  | 57.0 | 35.3 | 0.1 | 0.5  | 14.0 | 1.8 | 47.5 | 36.0 | 0.1 | 4.7  | 4.9  | 40.9 |
| S Germany, EU-04          | 2.4  | 73.8 | 23.8 | 0.6  | 71.9 | 27.5 | 8.2  | 48.5 | 43.3 | 1.3 | 0.4  | 0.1  | 7.7 | 43.7 | 46.8 | 1.3 | 0.4  |      | 46.9 |
| London, Paris, EU-05      | NA   | NA  | NA   | NA   | NA  | NA   | NA   | NA  | NA   | NA   | NA   |
| Italy, Munich, EU-06      | 2.5  | 71.2 | 26.3 | 29.6 | 39.6 | 30.8 | 12.4 | 56.0 | 31.6 | 0.1 | 2.1  | 24.5 | 0.3 | 36.8 | 36.1 | 0.1 | 1.3  | 0.2  | 8.5  |
| Spain, S France, EU-07    | 2.5  | 71.5 | 26.0 | 19.3 | 48.9 | 31.8 | 8.0  | 60.4 | 31.5 | 0.0 | 2.2  | 16.0 | 1.1 | 42.6 | 38.0 |     | 2.2  | 9.9  | 3.2  |
| London, BNR, Paris, EU-08 | 1.0  | 74.2 | 24.8 | 20.8 | 42.7 | 36.4 | 4.5  | 62.8 | 32.7 | 1.0 | 0.0  | 20.5 | 0.1 | 38.3 | 40.2 | 1.0 |      | 10.3 | 3.0  |
| Spain, S France, EU-09    | 5.5  | 66.0 | 28.5 | 35.1 | 32.3 | 32.6 | 4.0  | 69.2 | 26.8 | 0.1 | 5.1  | 24.4 | 0.0 | 29.9 | 40.5 | 0.1 | 3.7  | 0.6  | 18.4 |
| EM-EU                     | 2.5  | 71.9 | 25.6 | 22.2 | 46.5 | 31.3 | 7.4  | 60.0 | 32.6 | 0.4 | 2.0  | 18.2 | 1.3 | 39.1 | 39.1 | 0.3 | 1.0  | 0.6  | 9.6  |
| Germany→U-Tapao, AS-01    |      | 58.5 | 41.5 | 7.9  | 44.8 | 47.3 | 2.9  | 51.5 | 45.7 |     |      | 7.9  | 1.9 | 37.6 | 52.6 |     |      | 7.0  | 0.7  |
| U-Tapao→Tainan, AS-03     | 16.0 | 52.8 | 31.2 | 14.3 | 57.1 | 28.6 | 9.6  | 60.6 | 29.8 | 3.8 | 10.0 | 1.9  | 1.7 | 42.5 | 40.0 | 3.6 | 3.3  | 5.8  | 0.5  |
| China, AS-04              | 9.4  | 55.5 | 35.1 | 62.8 | 6.4  | 30.8 | 5.5  | 57.1 | 37.4 |     | 9.1  | 40.9 | 0.3 | 4.3  | 45.4 |     | 4.4  | 2.5  | 32.5 |
| Shanghai, Taipei, AS-05   | 52.3 | 17.5 | 30.1 | 61.6 | 12.1 | 26.3 | 5.7  | 67.7 | 26.6 | 2.0 | 46.9 | 8.0  |     | 6.9  | 36.2 | 1.7 | 41.4 | 3.1  | 6.1  |
| Manila, AS-06             | 38.3 | 20.7 | 41.0 | 36.3 | 31.8 | 31.9 | 0.7  | 73.5 | 25.8 | 7.4 | 25.4 | 5.8  |     | 11.6 | 49.8 | 7.3 | 22.9 | 0.6  | 5.7  |
| China, Taiwan, AS-07      |      | 75.9 | 24.1 | 66.6 | 3.1  | 30.3 | 11.0 | 51.7 | 37.3 |     |      | 65.4 | 1.0 | 0.9  | 32.7 |     |      | 46.5 | 7.2  |
| China, Taiwan, AS-08      | 3.8  | 78.2 | 18.1 | 61.0 | 15.7 | 23.2 | 5.3  | 69.1 | 25.7 |     | 3.7  | 53.6 |     | 15.0 | 27.6 |     | 2.7  | 0.2  | 41.1 |
| China, Taipei, AS-09      | 10.9 | 72.4 | 16.7 | 82.7 | 3.7  | 13.6 | 1.6  | 84.5 | 13.9 |     | 10.9 | 65.2 |     | 3.5  | 20.4 |     | 10.9 |      | 60.6 |
| Manila, PEA, Taiwan AS-10 | 24.8 | 46.8 | 28.4 | 61.3 | 13.5 | 25.3 | 1.9  | 79.6 | 18.5 | 0.1 | 22.6 | 28.6 |     | 12.1 | 36.6 | 0.1 | 20.8 | 0.9  | 27.3 |
| YAN, S Japan, AS-11       | 5.1  | 72.4 | 22.5 | 42.9 | 32.5 | 24.6 | 2.4  | 73.4 | 24.2 | 0.2 | 4.4  | 36.6 |     | 30.3 | 28.4 | 0.2 | 3.5  | 0.5  | 33.8 |
| Taiwan, AS-12             | 8.8  | 64.0 | 27.3 | 39.1 | 23.5 | 37.5 | 1.5  | 78.8 | 19.8 | 5.1 | 0.8  | 35.7 |     | 11.0 | 47.4 | 5.1 | 0.8  |      | 31.3 |
| S Japan, Taiwan, AS-13    | 9.5  | 56.3 | 34.2 | 32.1 | 25.7 | 42.2 | 0.5  | 73.2 | 26.3 | 1.5 | 4.4  | 26.2 |     | 17.4 | 50.6 | 1.5 | 4.4  |      | 25.4 |
| Tainan→U-Tapao, AS-14     | 36.7 | 33.4 | 29.9 | 43.7 | 41.1 | 15.2 | 1.6  | 82.7 | 15.7 | 6.0 | 29.3 | 12.4 |     | 18.6 | 33.7 | 6.0 | 25.7 | 0.8  | 10.6 |
| U-Tapao→Germany, AS-16    |      | 67.9 | 32.1 | 1.9  | 63.6 | 34.5 | 0.3  | 66.5 | 33.2 |     |      | 1.9  | 0.2 | 60.7 | 37.1 |     |      | 1.0  |      |
| EM-AS (03-14)             | 17.8 | 54.2 | 27.9 | 51.3 | 21.6 | 27.1 | 3.7  | 71.5 | 24.8 | 1.9 | 14.1 | 32.3 | 0.2 | 14.5 | 36.9 | 1.9 | 11.9 | 1.2  | 27.6 |

## To Section 4.2.1: Source regions with coordinates

**Table S3: Source regions and MPCs (italic) with coordinates for EMeRGe-Europe and -Asia (supplement of Table 4).**

| EMeRGe-Europe |       |                                        |                                 | EMeRGe-Asia |       |                                              |                                   |
|---------------|-------|----------------------------------------|---------------------------------|-------------|-------|----------------------------------------------|-----------------------------------|
| no.           | abbr. | source region/MPC                      | coordinates                     | no.         | abbr. | source region/MPC                            | coordinates                       |
| 1             | CAN   | Canada                                 | 134.0W-55.0W, 47.0N-71.0N       | 1           | EUA   | Europe/Northern Africa                       | 18.0W-34.0E, 5.0N-60.0N           |
| 2             | USA   | United States of America               | 134.0W-55.0W, 25.0N-47.0N       | 2           | WAS   | Western Asia                                 | 34.0E-68.0E, 5.0N-48.9N           |
| 3             | NAT   | North Atlantic Ocean                   | 55.0W-10.5W, 25.0N-71.0N        | 3           | WCH   | Western China                                | 68.0E-91.4E, 30.6N-48.9N          |
| 4             | IRE   | Ireland                                | 5.4W-10.5W, 50.6N-55.4N         | 4           | IND   | India                                        | 68.0E-91.4E, 5.0N-30.6N           |
| 5             | NGB   | Northern Great Britain                 | 5.4W-0.6E, 54.5N-60.0N          | 5           | CCH   | Central China                                | 91.4E-108.0E, 26.5N-48.9N         |
| 6             | SGB   | Southern Great Britain                 | 5.4W-2.2E, 50.0N-54.5N          | 6           | SCH   | Southern China                               | 91.4E-119.8E, 21.6N-26.5N         |
| 7             | BNR   | Belgium, Netherlands and Ruhr area     | 2.2E-8.0E, 50.0N-54.5N          | 7           | SEA   | Southeast Asia                               | 91.4E-111.2E, 5.0N-21.6N          |
| 8             | NFR   | Northern France                        | 5.4W-8.0E, 46.8N-50.0N          | 8           | MOR   | Mongolia/Southern Russia                     | 68.0E-122.6E, 48.9N-60.0N         |
| 9             | SFR   | Southern France                        | 5.4W-8.0E, 42.8N-46.8N          | 9           | ECH   | Eastern China                                | 108.0E-122.6E, 26.5N-48.9N        |
| 10            | IBE   | Iberian Peninsula                      | 10.5W-3.4E, 37.1N-42.8N         | 10          | TAW   | Taiwan                                       | 119.8E-122.6E, 21.6N-26.5N        |
| 11            | NGE   | Northern Germany                       | 8.0E-14.3E, 50.0N-54.5N         | 11          | NPH   | Northern Philippines                         | 119.8E-122.6E, 14.0N-18.7N        |
| 12            | SGE   | Southern Germany                       | 8.0E-14.3E, 46.8N-50.0N         | 12          | NEC   | Northeastern China                           | 122.6E-135.0E, 40.4N-55.0N        |
| 13            | NIT   | Northern Italy                         | 8.0E-14.3E, 42.8N-46.8N         | 13          | KOR   | Korea                                        | 122.6E-129.6E, 30.6N-40.4N        |
| 14            | SIT   | Southern Italy                         | 11.6E-18.0E, 37.1N-42.8N        | 14          | JAP   | Japan                                        | 129.6E-150.0E, 30.6N-40.4N        |
| 15            | NAF   | Northern Africa                        | 10.5W-23.9.0E, 25.0N-37.1N      | 15          | ECS   | East China Sea                               | 122.6E-150.0E, 14.0N-30.6N        |
| 16            | NEU   | Northern Europe                        | 0.6E-37.0E, 54.5N-71.0N         |             | UA    | Unspecified areas                            |                                   |
| 17            | EEU   | Eastern Europe                         | 14.3W-37.0W, 42.8N-54.5N        | M1          | XBS   | <i>Δ Xian-Beijing-Shanghai (incl.in ECH)</i> | <i>109.8E-122.6E, 30.6N-40.4N</i> |
|               | UA    | Unspecified areas                      |                                 | M2          | BEI   | <i>Beijing (incl.in XBS)</i>                 | <i>115.6E-119.0E, 38.8N-40.4N</i> |
| M1            | LON   | <i>London (incl.in SGB)</i>            | <i>2.0W-1.5W, 50.5N-52.0N</i>   | M3          | YAN   | <i>Yangtze River Delta (incl.in XBS)</i>     | <i>118.0E-122.6E, 30.6N-32.8N</i> |
| M2            | PAR   | <i>Paris (incl.in NFR)</i>             | <i>1.0E-3.5E, 48.0N-50.0N</i>   | M4          | PEA   | <i>Pearl River Delta (incl.in SEC)</i>       | <i>112.0E-114.8E, 21.6N-24.0N</i> |
| M3            | MAD   | <i>Madrid (incl.in IBE)</i>            | <i>6.1W-3.0W, 39.5N-41.9N</i>   | M5          | TOK   | <i>Tokyo (incl.in SJA)</i>                   | <i>139.2E-140.6E, 35.2N-36.4N</i> |
| M4            | BAR   | <i>Barcelona (incl.in IBE)</i>         | <i>0.8E-3.0E, 40.9N-41.9N</i>   | M6          | OSA   | <i>Osaka (incl.in JAP)</i>                   | <i>135.0E-137.3E, 34.4N-35.6N</i> |
| M5            | POV   | <i>Po Valley/ Milano (incl.in NIT)</i> | <i>8.0E-13.0E, 44.0N-46.0N</i>  | M7          | BAN   | <i>Bangkok (incl.in SEA)</i>                 | <i>100.0E-101.0E, 13.4N-14.3N</i> |
| M6            | ROM   | <i>Rome (incl.in SIT)</i>              | <i>11.6E-13.7E, 41.2N-42.8N</i> | M8          | MAN   | <i>Manila (incl.in NPH)</i>                  | <i>120.5E-121.5E, 14.0N-15.0N</i> |
| M7            | MUN   | <i>Munich (incl.in SGE)</i>            | <i>10.4E-12.0E, 47.9N-49.0N</i> | M9          | TAI   | <i>Taipei (incl.in TAW)</i>                  | <i>120.8E-122.0E, 24.8N-25.7N</i> |

To Section 4.2.3: Linking and partitioning modelled source region emissions to observations (considering all uptakes)

60 Table S4: Trajectory-based emission contributions from different source regions (left from EMeRGe-Europe, right EMeRGe-Asia), listed according to temporal frequency and magnitude (contribution in %, flight time in min, uptake sum in kg). Mixtures (of significant uptakes) from different sources regions are indicated by hyphens, e.g. “IRE-SGB”. MPCs are highlighted with bold letters. Contributions of less than 10 minutes flight time are omitted. The upper part indicates the overview (sums) of both campaigns. For full names of source regions see Table 4 in the main document.

| EMeRGe-Europe           |                                       |                          |                 | EMeRGe-Asia             |                                       |                          |                 |
|-------------------------|---------------------------------------|--------------------------|-----------------|-------------------------|---------------------------------------|--------------------------|-----------------|
| observations linked to  | Contribution to total flight time [%] | linked flight time [min] | uptake sum [kg] | observations linked to  | Contribution to total flight time [%] | linked flight time [min] | uptake sum [kg] |
| no up-take              | 35.4                                  | 1103                     | 0               | no up-take              | 39.9                                  | 2248                     | 0               |
| all uptakes             | 64.6 (32.1)                           | 2017 (1004)              | 42.0 (31.3)     | all uptakes             | 60.1 (18.6)                           | 3392 (1045)              | 454.0 (398.9)   |
| non-mixed (MPCs)        | 19.3 (3.6)                            | 603 (114)                | 3.3 (0.5)       | non-mixed (MPCs)        | 16.2 (0.5)                            | 915 (27)                 | 23.2 (2.4)      |
| mixture (MPCs involved) | 45.3 (28.4)                           | 1414 (889)               | 38.7 (30.8)     | mixture (MPCs involved) | 43.9 (18.1)                           | 2477 (1017)              | 430.8 (396.5)   |
| EM-EU (7 flights)       | 100                                   | 3120                     | 42.0            | EM-AS (12 flights)      | 100                                   | 5640                     | 454.0           |

  

| source region(s)/ MPCs | Contribution to total flight time [%] | linked flight time [min] | uptake sum [kg] | source region(s)/ MPCs | Contribution to total flight time [%] | linked flight time [min] | uptake sum [kg] |
|------------------------|---------------------------------------|--------------------------|-----------------|------------------------|---------------------------------------|--------------------------|-----------------|
| NAT                    | 3.4                                   | 106.0                    | 0.0             | TAW-ECS                | 2.6                                   | 145.0                    | 5.8             |
| IBE                    | 3.1                                   | 98.0                     | 0.2             | SEA                    | 2.3                                   | 131.0                    | 6.2             |
| USA                    | 2.5                                   | 78.0                     | 0.8             | WAS                    | 2.2                                   | 126.0                    | 1.0             |
| CAN                    | 2.4                                   | 75.0                     | 0.1             | TAW                    | 1.8                                   | 99.0                     | 6.1             |
| IBE-MAD                | 2.0                                   | 63.0                     | 0.4             | CCH                    | 1.7                                   | 98.0                     | 1.4             |
| MAD                    | 1.9                                   | 59.0                     | 0.3             | ECS                    | 1.7                                   | 95.0                     | 0.0             |
| CAN-USA                | 1.0                                   | 32.0                     | 0.3             | EUA                    | 1.6                                   | 88.0                     | 0.8             |
| SFR                    | 1.0                                   | 32.0                     | 0.6             | TAW-JAP-ECS            | 1.5                                   | 87.0                     | 2.5             |
| MUN                    | 1.0                                   | 32.0                     | 0.1             | SCH-TAW-ECS            | 1.4                                   | 80.0                     | 2.5             |
| NAF                    | 1.0                                   | 30.0                     | 0.1             | SCH                    | 1.1                                   | 62.0                     | 3.0             |
| NEU                    | 0.9                                   | 29.0                     | 0.1             | WCH                    | 1.0                                   | 59.0                     | 0.1             |
| SFR-IBE-UA             | 0.9                                   | 28.0                     | 0.2             | TAW-ECS-TAI            | 1.0                                   | 58.0                     | 5.7             |
| BNR-NEU                | 0.9                                   | 27.0                     | 1.6             | UA                     | 0.9                                   | 53.0                     | 0.1             |
| IBE-NAF                | 0.7                                   | 21.0                     | 0.2             | TAW-JAP-ECS-TAI        | 0.8                                   | 47.0                     | 2.1             |
| NAT-SFR-UA             | 0.6                                   | 20.0                     | 0.2             | NPH-ECS                | 0.8                                   | 47.0                     | 1.2             |
| NAT-IRE-SGB-LON        | 0.6                                   | 19.0                     | 0.7             | ECH                    | 0.8                                   | 44.0                     | 0.2             |
| NAT-SFR-IBE-UA         | 0.6                                   | 18.0                     | 0.2             | ECH-XBS                | 0.8                                   | 44.0                     | 5.2             |
| SFR-NIT-POV-UA         | 0.6                                   | 18.0                     | 1.2             | IND                    | 0.7                                   | 42.0                     | 1.6             |
| NFR-SGE-PAR-MUN        | 0.5                                   | 17.0                     | 0.7             | SCH-SEA                | 0.7                                   | 42.0                     | 3.2             |
| IBE-UA                 | 0.5                                   | 17.0                     | 0.1             | CCH-ECH-XBS            | 0.7                                   | 40.0                     | 5.0             |
| USA-SFR-UA             | 0.5                                   | 16.0                     | 0.3             | SEA-UA                 | 0.7                                   | 38.0                     | 3.3             |
| UA                     | 0.5                                   | 16.0                     | 0.0             | ECH-ECS-XBS            | 0.7                                   | 38.0                     | 2.1             |
| CAN-MUN                | 0.5                                   | 15.0                     | 0.2             | CCH-ECH                | 0.6                                   | 36.0                     | 0.9             |
| USA-NAT-IRE-SGB        | 0.5                                   | 15.0                     | 0.3             | SCH-TAW                | 0.6                                   | 35.0                     | 0.3             |
| NAT-SFR                | 0.5                                   | 15.0                     | 0.1             | IND-SCH                | 0.6                                   | 32.0                     | 5.6             |
| SFR-IBE-BAR-UA         | 0.5                                   | 15.0                     | 0.2             | IND-SEA                | 0.5                                   | 31.0                     | 2.0             |
| NFR                    | 0.4                                   | 14.0                     | 0.0             | ECS-UA                 | 0.5                                   | 31.0                     | 0.0             |
| SFR-IBE                | 0.4                                   | 14.0                     | 0.1             | JAP                    | 0.5                                   | 30.0                     | 0.0             |
| NAT-IRE-SGB            | 0.4                                   | 13.0                     | 0.3             | EUA-UA                 | 0.5                                   | 28.0                     | 0.3             |
| NAT-SGB-LON            | 0.4                                   | 13.0                     | 0.4             | WCH-CCH                | 0.5                                   | 28.0                     | 0.2             |
| NAT-SFR-IBE-BAR-UA     | 0.4                                   | 13.0                     | 0.1             | XBS                    | 0.5                                   | 26.0                     | 2.4             |
| SGB-LON                | 0.4                                   | 12.0                     | 0.1             | KOR-JAP-ECS            | 0.4                                   | 25.0                     | 0.4             |
| NIT-EEU-POV            | 0.4                                   | 12.0                     | 0.4             | SEA-NPH-ECS-UA         | 0.4                                   | 21.0                     | 2.0             |
| USA-SFR                | 0.4                                   | 11.0                     | 0.2             | KOR-ECS                | 0.4                                   | 21.0                     | 0.0             |
| IBE-NAF-UA             | 0.4                                   | 11.0                     | 0.3             | EUA-TAW                | 0.4                                   | 20.0                     | 1.0             |
| IBE-NAF-MAD            | 0.3                                   | 10.0                     | 0.2             | CCH-SCH                | 0.4                                   | 20.0                     | 2.7             |
| NEU-EEU                | 0.3                                   | 10.0                     | 0.1             | SEA-ECS-UA             | 0.4                                   | 20.0                     | 1.7             |
| POV                    | 0.3                                   | 10.0                     | 0.1             | NPH-MAN                | 0.4                                   | 20.0                     | 6.3             |
|                        |                                       |                          |                 | NEC-JAP-ECS            | 0.3                                   | 19.0                     | 1.6             |
|                        |                                       |                          |                 | JAP-ECS                | 0.3                                   | 19.0                     | 0.2             |
|                        |                                       |                          |                 | SEA-TAW-ECS-UA         | 0.3                                   | 18.0                     | 1.9             |
|                        |                                       |                          |                 | TAW-TAI                | 0.3                                   | 18.0                     | 0.4             |
|                        |                                       |                          |                 | ECS-XBS                | 0.3                                   | 18.0                     | 2.3             |

|   |      |      |      |   |                                             |      |      |       |
|---|------|------|------|---|---------------------------------------------|------|------|-------|
|   |      |      |      |   | IND-SCH-SEA                                 | 0.3  | 17.0 | 2.0   |
|   |      |      |      |   | SCH-TAW-JAP-ECS                             | 0.3  | 17.0 | 0.1   |
|   |      |      |      |   | SCH-ECS-UA                                  | 0.3  | 17.0 | 0.0   |
|   |      |      |      |   | TAW-NEC-KOR-ECS                             | 0.3  | 17.0 | 2.2   |
|   |      |      |      |   | TAW-KOR-JAP-ECS                             | 0.3  | 17.0 | 1.2   |
|   |      |      |      |   | TAW-KOR-JAP-ECS- <b>TAI</b>                 | 0.3  | 17.0 | 1.0   |
|   |      |      |      |   | KOR-JAP                                     | 0.3  | 16.0 | 0.5   |
|   |      |      |      |   | EUA-WAS                                     | 0.3  | 15.0 | 0.3   |
|   |      |      |      |   | NPH-ECS- <b>MAN</b>                         | 0.3  | 15.0 | 4.1   |
|   |      |      |      |   | TAW-NEC-KOR-JAP-ECS- <b>TAI</b>             | 0.3  | 14.0 | 4.4   |
|   |      |      |      |   | TAW-NEC-KOR-JAP-ECS                         | 0.2  | 14.0 | 0.3   |
|   |      |      |      |   | NPH                                         | 0.2  | 14.0 | 0.3   |
|   |      |      |      |   | TAW-ECS-UA                                  | 0.2  | 12.0 | 1.8   |
|   |      |      |      |   | SCH-TAW-ECS-UA                              | 0.2  | 12.0 | 1.7   |
|   |      |      |      |   | TAW-KOR-ECS- <b>TAI</b>                     | 0.2  | 12.0 | 1.2   |
|   |      |      |      |   | EUA-TAW- <b>TAI</b>                         | 0.2  | 11.0 | 0.5   |
|   |      |      |      |   | SEA-NPH-JAP-ECS-UA                          | 0.2  | 11.0 | 1.7   |
|   |      |      |      |   | TAW-JAP-ECS-UA                              | 0.2  | 10.0 | 0.2   |
|   |      |      |      |   | ECH-TAW-NEC-KOR-JAP-ECS- <b>YAN-XBS-TAI</b> | 0.2  | 10.0 | 9.4   |
|   |      |      |      |   | WAS-CCH                                     | 0.2  | 10.0 | 0.1   |
|   |      |      |      |   | CCH-SCH-SEA                                 | 0.2  | 10.0 | 0.5   |
| Σ | 33.6 | 1054 | 11.5 | Σ |                                             | 41.8 | 2367 | 124.8 |

To obtain significant CO uptakes (as described in section 4.2.3 in the main document), we omit uptakes below 2.6 g CO (EMeRGe-Europe) and 20.6 g CO (EMeRGe-Asia), respectively. The sum of all small uptakes below the given thresholds add up to 5 % of the total CO uptake sum of the respective campaign part. However, we investigated also smaller and larger thresholds (0.25, 0.5, 2, 4 and 8 times) as well. The larger the threshold, the more source regions with large emission uptake sums dominate, and the smaller the overall contributing number of source regions. However, the dominating source regions do not change when applying these thresholds, only their contribution to the flight time. The selected filter is a compromise of neglecting small uptakes and obtaining a sufficient data basis to assess chemical fingerprints.

## References

Acharya, D., Rani, A., Agarwal, S. and Singh, V.: Application of adaptive Savitzky–Golay filter for EEG signal processing, *Perspect. Sci.*, 8, 677–679, doi:10.1016/j.pisc.2016.06.056, 2016.

Savitzky, A. and Golay, M. J. E.: Smoothing and Differentiation of Data by Simplified Least Squares Procedures., *Anal. Chem.*, 36(8), 1627–1639, doi:10.1021/ac60214a047, 1964.
